# Supplementary material for: Development of the excretory system in a polyplacophoran mollusc: stages in metanephridial system development
Source: PubMed Central journal article supplement (PMC3494531; doi:10.1186/1742-9994-9-23), 2012-09-14

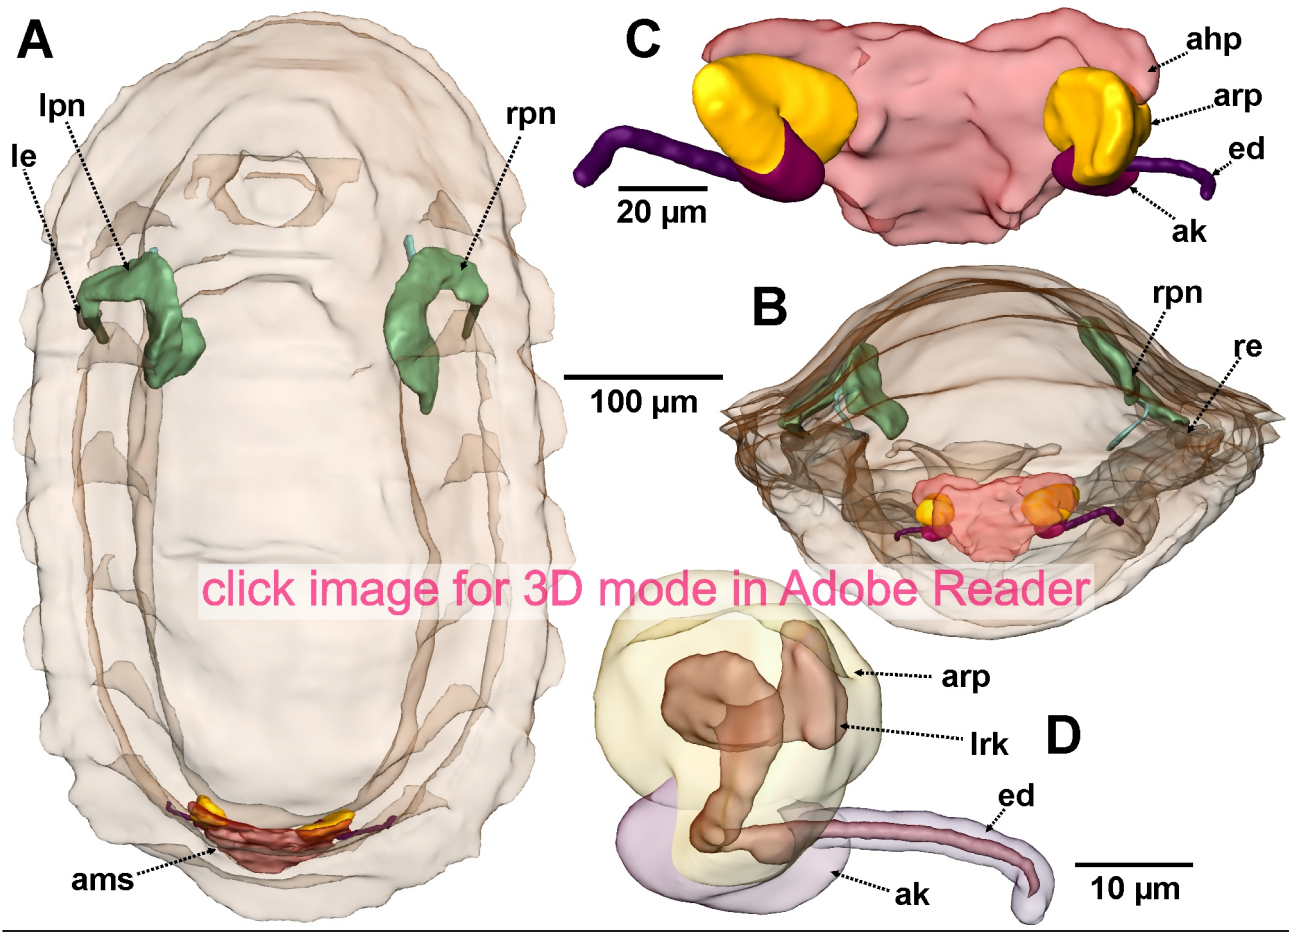

Supplement: 1742-9994-9-23-S1.pdf [file 1742-9994-9-23-S1.pdf]
